# Supplementary material for: Crystal structure, luminescence properties, energy transfer and thermal properties of a novel color-tunable, white light-emitting phosphor Ca9−x−yCe(PO4)7:xEu2+,yMn2+
Source: Royal Society of Chemistry journal article supplement (doi:10.1039/c6cp05490k), 2016-01-01
Supplement: c6cp05490k1.pdf [file c6cp05490k1.pdf]

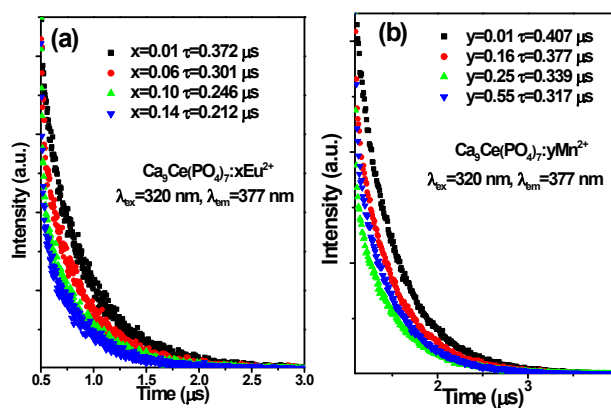

Figure S1 Photoluminescence decay curves of  $\text{Ce}^{3+}$  in  $\text{CCPO}:x\text{Eu}^{2+}$  and  $\text{CCPO}:y\text{Mn}^{2+}$  phosphors.

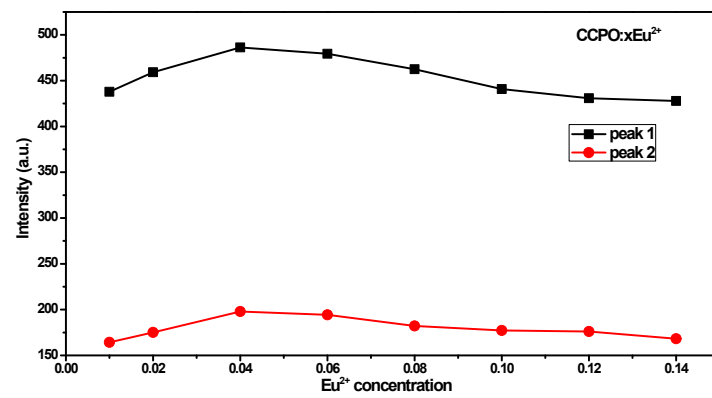

Figure S2 Intensity variation of the two sub-peaks of Eu<sup>2+</sup> in CCPO:xEu<sup>2+</sup> phosphors.

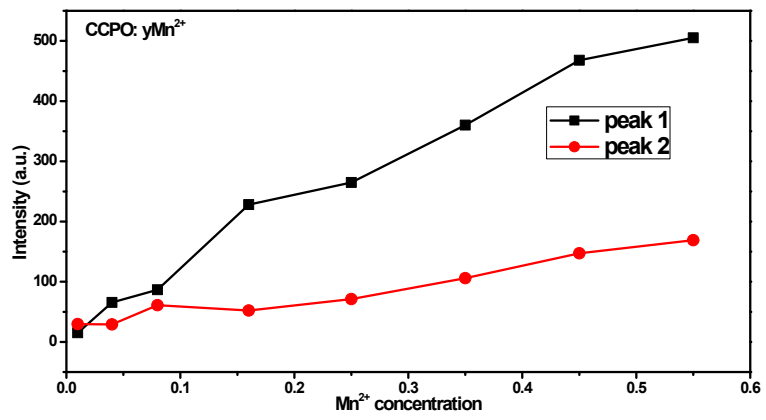

Figure S3 Intensity variation of the two sub-peaks of Mn<sup>2+</sup> in CCPO:yMn<sup>2+</sup> phosphors.
